# Supplementary material for: Effects of Statin Combinations on Zika Virus Infection in Vero Cells
Source: MDPI journal article supplement (doi:10.3390/pharmaceutics15010050), 2022-12-23
Supplement: s1 [file s1]

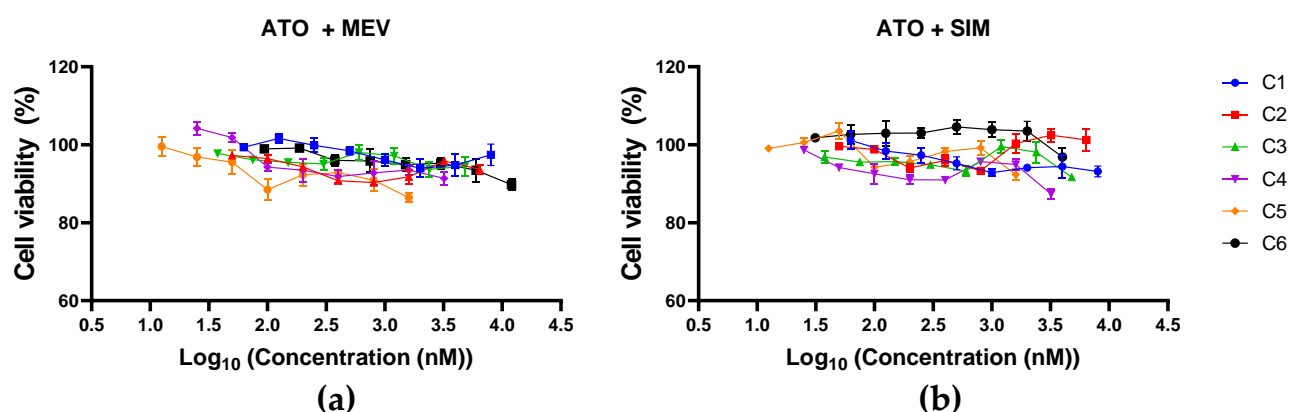

**Figure S1.** Effects of the combination of atorvastatin (ATO) with (a) mevastatin (MEV) and (b) simvastatin (SIM) on Vero cell viability. Uninfected Vero cells were treated with different drug combinations ( $n = 3$  per combination/dilution). Cell viabilities were calculated relative to that of the DMSO (0.5%) uninfected control, which was assigned as 100%. All concentrations for C1–C5 are based on ATO concentrations. C6 concentrations reflect the concentrations of (a) MEV and (b) SIM in C6.

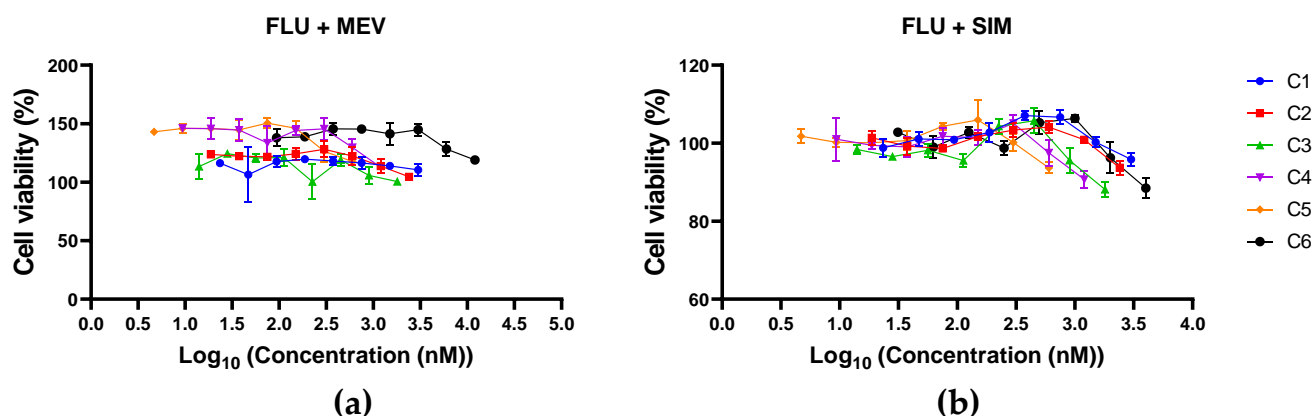

**Figure S2.** Effects of the combination of fluvastatin (FLU) with (a) mevastatin (MEV) and (b) simvastatin (SIM) on Vero cell viability. Uninfected Vero cells were treated with different drug combinations ( $n = 3$  per combination/dilution). Cell viabilities were calculated relative to that of the DMSO (0.5%) uninfected control, which was assigned as 100%. All concentrations for C1–C5 are based on FLU concentrations. C6 concentrations reflect the concentrations of (a) MEV and (b) SIM in C6.
